# Supplementary material
Source: Research Square preprint supplement (doi:10.21203/rs.3.rs-9438093/v1)
Supplement: Supplementary file 1 [file 5a749c0887353addea902e5d.docx]

**Table 2.** Characteristics of umbilical cord blood, platelet rich plasma and platelet concentrate

(n = 10)

| **Preparation** | **Median (IQR)** | | | | |
| --- | --- | --- | --- | --- | --- |
| **Volume**  **(mL)** | **Platelets**  **(109)** | **Leukocytes (109)** | **Erythrocytes (1012)** | **Hemoglobin**  **(g/L)** |
| **UCB** | 105 (91,4 - 118,3) | 22,2 (17,3 - 33,5) | 1 (0,8 - 1,3) | 0,4 (0,3 - 0,4) | 106,5 (104 - 119,5) |
| **PRP** | 40,9 (36,7 - 43,6) | 12 (7,8 - 17,5) | 0 (0 - 0) | 0 (0 - 0) | 1 (0 - 1) |
| **UCB-PC** | 8,4 (7,12 - 11,91) | 7,3 (4,66 - 13,51) | 0 (0 - 0,01) | 0,1 (0,07 - 0,14) | 1 (0 - 2) |
| **UCB-PL** | n.a. | 948 (615 – 1228) | 0,58 (0,32 – 0,93) | n.a. | n.a. |

UCB - *umbilical cord blood*, PRP - *platelet rich plasma*, UCB-PC - *umbilical cord blood platelate concentrat, n.a.-not applicable*
