# Supplementary material
Source: Research Square preprint supplement (doi:10.21203/rs.3.rs-9438093/v1)
Supplement: Supplementary file 2 [file e55bfe29ac381b383f833ade.docx]

Table 1. Major growth factors involved in ocular tissue regeneration. Adapted from Alió et al. (2019).

| **Growth factor** | **Main function in ocular tissue regeneration** | **References** |
| --- | --- | --- |
| **Epidermal growth factor (EGF)** | Promotes epithelial cell migration and proliferation; accelerates epithelial wound healing | Zieske et al. 2000; Nakamura et al. 2001 |
| **Hepatocyte growth factor (HGF)** | Stimulates epithelial cell migration and proliferation; inhibits apoptosis of corneal epithelial cells | Wilson et al. 1993; Daniels et al. 2000 |
| **Keratinocyte growth factor (KGF)** | Maintains epithelial homeostasis and promotes epithelial wound healing | Chandrasekher et al. 2001 |
| **Insulin-like growth factor-1 (IGF-1)** | Regulates epithelial cell growth, migration, differentiation, proliferation, and survival | Lee et al. 2006; Trosan et al. 2012 |
| **Transforming growth factor-β (TGF-β)** | Inhibits corneal epithelial cell proliferation; stimulates stromal fibroblast proliferation | Pancholi et al. 1998; Andresen et al. 1997; Kay et al. 1998; Haber et al. 2003 |
| **Platelet-derived growth factor (PDGF)** | Induces keratocyte migration and proliferation; key regulator of corneal wound healing | Denk et al. 1997; Kamiyama et al. 1998; Daniels et al. 2000 |
| **Thymosin-β4** | Enhances epithelial wound healing; reduces inflammation and inhibits apoptosis | Sosne et al. 2016; Dunn et al. 2010 |
| **Nerve growth factor (NGF)** | Promotes epithelial and stromal healing; anti-inflammatory effects; supports corneal nerve regeneration | Lambiase et al. 2000; Joo et al. 2004 |
| **Opioid growth factor (OGF)** | Inhibits corneal epithelial cell proliferation, migration, and organization | Zagon et al. 1995 |
| **Vascular endothelial growth factor (VEGF)** | Induces angiogenesis during wound healing; regulates vascular permeability; endothelial cell mitogen | Alió et al. 2019 |
| **Brain-derived neurotrophic factor (BDNF)** | Promotes epithelial proliferation and wound healing in vitro; involved in sensory neurotransmission and nociceptive pathways | You et al. 2000; Thakkar et al. 2023 |
