# Supplementary material
Source: Research Square preprint supplement (doi:10.21203/rs.3.rs-9438093/v1)
Supplement: Supplementary file 3 [file ed9c40ed05a650708ff2caf3.docx]

**Table 3.** Concentrations of TGF-β, PDGF, EGF, VEGF, BDNF, and HGF in UCB-PL

Data are presented as median (interquartile range).

| **Growth factor** | **Baseline** | **3 months** | **6 months** | **P*** |
| --- | --- | --- | --- | --- |
| **TGF-β** | 2205.9  (1648.5–2710.4) | 1522.1  (866.8–1582.7) | 0.31  (0–1.63) | <0.001† |
| **BDNF** | 775.1  (697.0–792.5) | 2296.2  (1156.9–2646.5) | 372.1  (206.9–730.4) | <0.001† |
| **EGF** | 117.03  (54.3–246.8) | 488.4  (254.2–568.9) | 225.8  (140.8–323.1) | <0.001† |
| **HGF** | 1965.5  (1773.7–2515.9) | 8796.2  (7531.4–9829.3) | 328.9  (252.2–392.8) | <0.001† |
| **PDGF-BB** | 62.1  (16.6–329.3) | 1457.6  (324.9–3733.2) | 2248.5  (980.4–4408.7) | <0.001‡ |
| **VEGF-A** | 1443.2  (794.0–2441.2) | 2022.7  (1303.5–3120.8) | 1785.1  (830.6–2819.6) | 0.001§ |
| **VEGF-D** | 106.6  (80.4–131.3) | 134.4  (74.1–145.7) | 7.9  (6.9–9.3) | <0.001† |

**Statistical analysis**

* Friedman test with post hoc Conover analysis.
† Significant differences between all time points at *P* < 0.05.
‡ At *P* < 0.05, the lowest values were observed at baseline compared with 3 and 6 months.
§ At *P* < 0.05, values at 3 months were significantly higher than at baseline and 6 months.
